# Supplementary material
Source: publisher figshare collection journal article supplement (https://acs.figshare.com/ndownloader/files/9582679)
Supplement: Supplementary file 1 [file 9582679]

## **Elastic Bending Flexibility of Fluorescent Organic Single Crystal: New Aspects of Commonly Used Building Block “4,7-Dibromo-2,1,3-benzothiadiazole”**

Shotaro Hayashi,\* Toshio Koizumi and Natsumi Kamiya

*Department of Applied Chemistry, National Defense Academy, 1-10-20, Hashirimizu, Yokosuka, Kanagawa 239-8686, Japan*

### **Materials and Methods**

#### **Chemicals**

4,7-Dibromo-2,1,3-benzothiadiazole (Aldrich) were used as received. Solvents were used as received.

#### **Measurements**

UV-vis absorption spectra were obtained on an Ocean Optics USB4000-XR1 fiber spectrometer with DH2000-BAL tungsten halogen light source. Fluorescence spectra were obtained on an Ocean Optics USB4000 fiber spectrometer with PX-2 pulsed xenon light source. Absolute quantum yield were obtained by Hamamatsu C9920-02. The single crystal X-ray diffraction data for single crystals were collected at room temperature using SMART APEX II (Bruker AXS) with a CCD detector. The crystal structures were solved by the direct method and refined by full matrix least-squares using SHELXTL. XRD analysis was performed by JEOL JDX-3530 X-ray diffractometer system. Crystal images were obtained by optical microscope, KEYENCE VH-Z500R. DSC analysis was performed by a Shimadzu DS-60, which measured during heating from room temperature to 250 °C at heating rate of 10 °C/min in nitrogen.

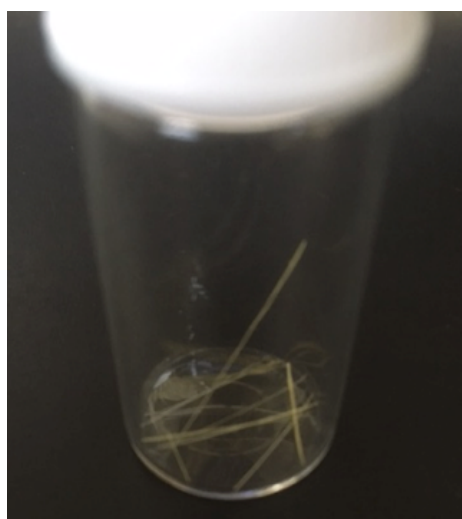

Figure S1. Single crystals of **DBBT**.



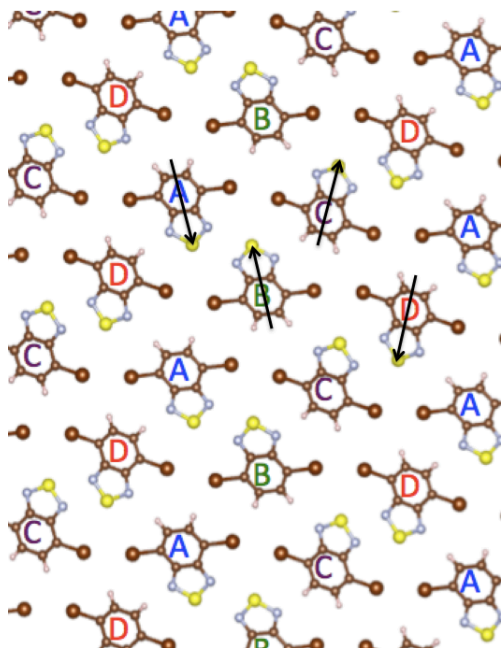

Figure S4. Crystal Structure of **DBBT** at (100) face.

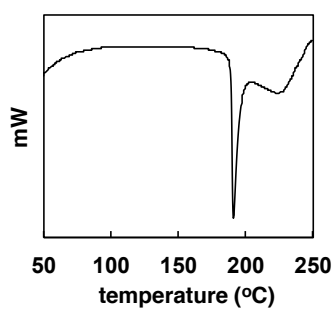

Figure S5. DSC trace of the crystal.

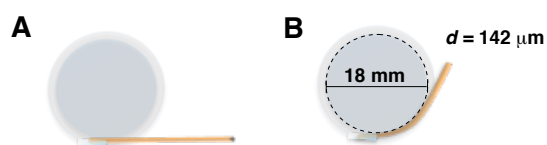

Figure S6. Illustration of straight (A) and bent (B) crystals.

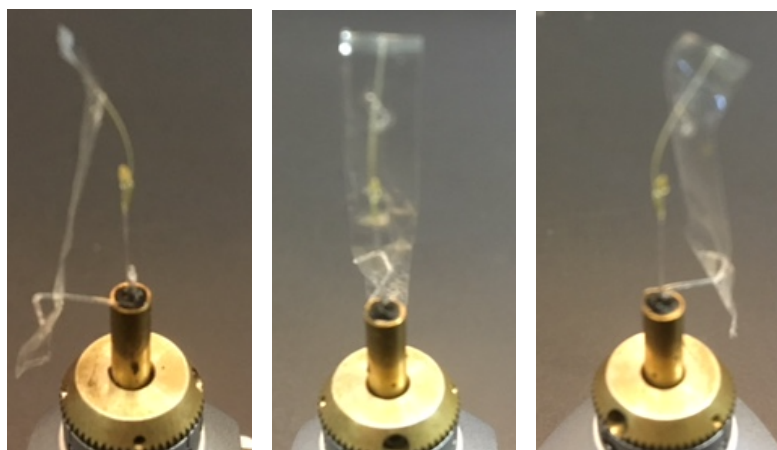

Figure S7. Photograph of bent crystal fixed by capillary and PE.

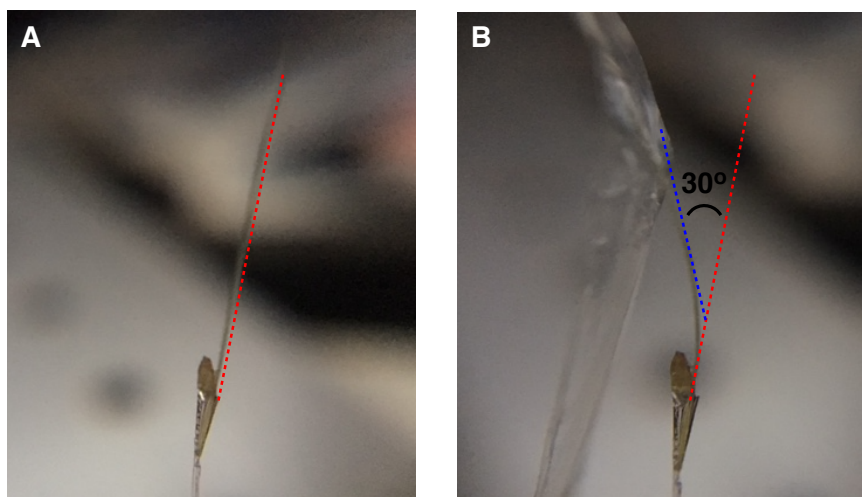

Figure S8. (A) Original crystal. (B) Bent crystal.

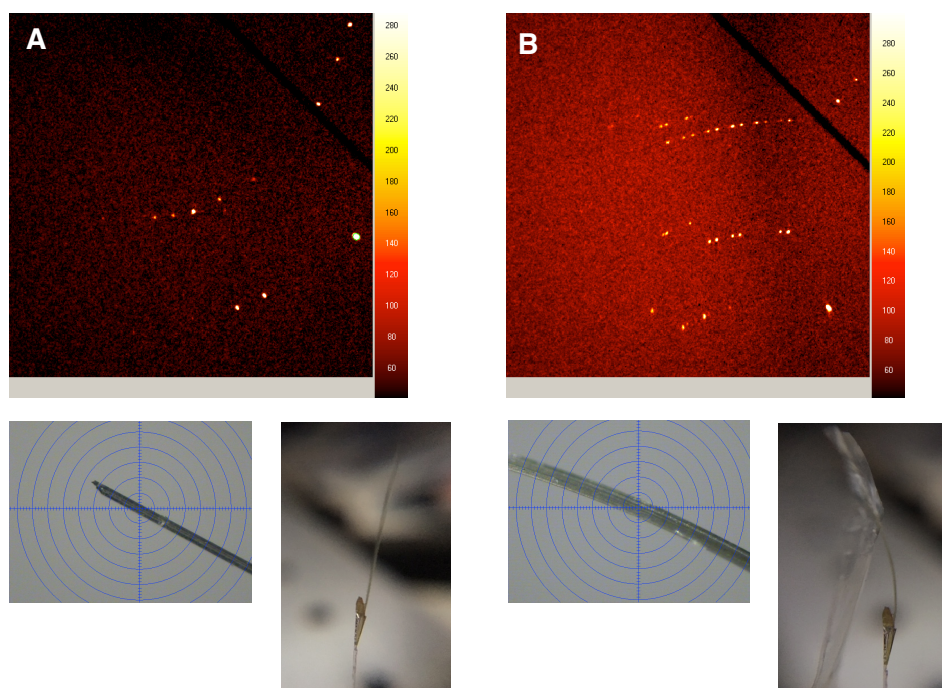

Figure S9. SCXRD patterns of (A) original crystal and (B) bent crystal.

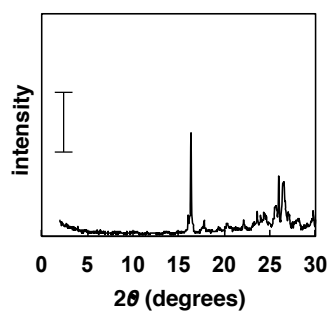

Figure S10. XRD patterns of **DBBT** in powder. Scale: 1000 counts.



Table S1. Crystal data and structure refinement for **DBBT**.

|                                   |                                                                |                             |
|-----------------------------------|----------------------------------------------------------------|-----------------------------|
| Identification code               | global                                                         |                             |
| Empirical formula                 | C <sub>6</sub> H <sub>2</sub> Br <sub>2</sub> N <sub>2</sub> S |                             |
| Formula weight                    | 293.98                                                         |                             |
| Temperature                       | 300.0(2) K                                                     |                             |
| Wavelength                        | 0.71073 Å                                                      |                             |
| Crystal system                    | Monoclinic                                                     |                             |
| Space group                       | P 1 21/c 1                                                     |                             |
| Unit cell dimensions              | a = 18.3706(13) Å                                              | $\alpha = 90^\circ$ .       |
|                                   | b = 3.9543(2) Å                                                | $\beta = 97.441(3)^\circ$ . |
|                                   | c = 22.1361(17) Å                                              | $\gamma = 90^\circ$ .       |
| Volume                            | 1594.49(19) Å <sup>3</sup>                                     |                             |
| Z                                 | 8                                                              |                             |
| Density (calculated)              | 2.449 mg/m <sup>3</sup>                                        |                             |
| Absorption coefficient            | 10.356 mm <sup>-1</sup>                                        |                             |
| F(000)                            | 1104                                                           |                             |
| Crystal size                      | 0.200 x 0.140 x 0.020 mm <sup>3</sup>                          |                             |
| Theta range for data collection   | 2.24 to 26.04°.                                                |                             |
| Index ranges                      | -22 ≤ h ≤ 22, -4 ≤ k ≤ 3, -27 ≤ l ≤ 25                         |                             |
| Reflections collected             | 17190                                                          |                             |
| Independent reflections           | 3105 [R(int) = 0.0531]                                         |                             |
| Completeness to theta = 26.04°    | 99.0 %                                                         |                             |
| Absorption correction             | Semi-empirical from equivalents                                |                             |
| Max. and min. transmission        | 0.82 and 0.52                                                  |                             |
| Refinement method                 | Full-matrix least-squares on F <sup>2</sup>                    |                             |
| Data / restraints / parameters    | 3105 / 0 / 200                                                 |                             |
| Goodness-of-fit on F <sup>2</sup> | 1.169                                                          |                             |
| Final R indices [I > 2σ(I)]       | R1 = 0.0526, wR2 = 0.1662                                      |                             |
| R indices (all data)              | R1 = 0.0739, wR2 = 0.1859                                      |                             |
| Extinction coefficient            | 0.0060(7)                                                      |                             |
| Largest diff. peak and hole       | 1.620 and -1.691 e.Å <sup>-3</sup>                             |                             |
